# Supplementary material for: A review of fatty acid profiles and antioxidant content in grass-fed and grain-fed beef
Source: Springer Nature journal article supplement (doi:10.1186/1475-2891-9-10), 2010-03-10
Supplement: 12937_2009_266_MOESM2_ESM.pdf [file 12937_2009_266_MOESM2_ESM.pdf]

## Rumen

## Tissues

Dietary Fat e.g. Linoleic Acid  
*cis*-9, *cis*-12 C18:2

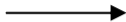

*cis*-9, *cis*-12 C18:2

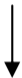

*cis*-9, *trans*-11 C18:2 (CLA)

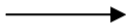

*cis*-9, *trans*-11 C18:2 (CLA)

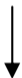

*trans*-11 C18:1 (Vaccenic acid)

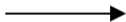

*trans*-11 C18:1

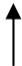

$\Delta$ -9-Desaturase

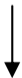

C18:0 (Stearic acid)

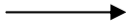

C18:0  $\longrightarrow$  *cis*-9 C18:1  
 $\Delta$ -9-Desaturase
