# Supplementary figures and images for: A review of fatty acid profiles and antioxidant content in grass-fed and grain-fed beef
Source: Springer Nature journal article supplement (doi:10.1186/1475-2891-9-10), 2010-03-10

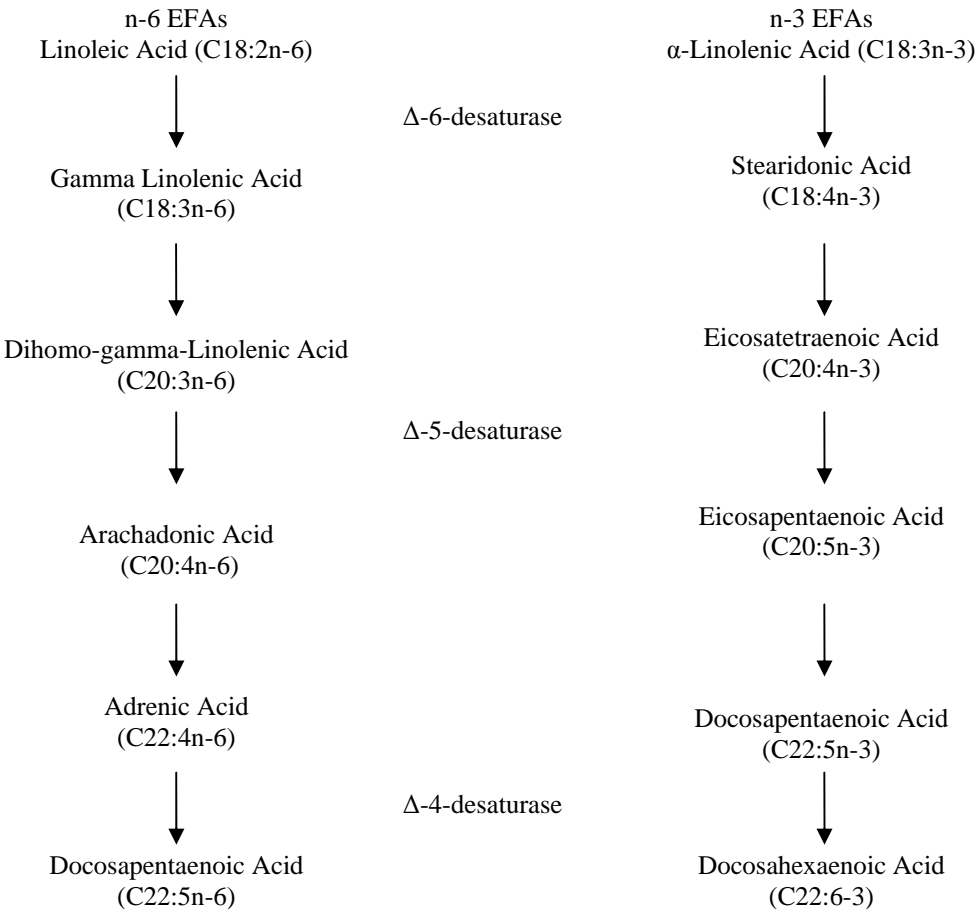

Supplement: 12937_2009_266_MOESM1_ESM.pdf [file 12937_2009_266_MOESM1_ESM.pdf]
